# Supplementary material for: Theoretical design of an ultrafast supramolecular rotor composed of carbon nano-rings
Source: Royal Society of Chemistry journal article supplement (doi:10.1039/d0cc04806b), 2020-01-01
Supplement: d0cc04806b1.pdf [file d0cc04806b1.pdf]

## Electronic Supplementary Information

### Theoretical Design of an Ultrafast Supramolecular Rotor Composed of Carbon Nano-rings

Yuhang Jiang,<sup>a</sup> Edoardo Jun Mattioli,<sup>b</sup> Matteo Calvaresi,<sup>\*b</sup> Zhiyong Wang<sup>\*a</sup>

<sup>a</sup> Department of Chemistry, Renmin University of China, Beijing 100872, PR China

<sup>b</sup> Dipartimento di Chimica “G. Ciamician”, Alma Mater Studiorum – Università di  
Bologna, via F. Selmi 2, 40126 Bologna, Italy.

\*E-mails: zhiyongwang@ruc.edu.cn; matteo.calvaresi3@unibo.it.

## (1) Theoretical calculation methods and results

Density functional theory (DFT) calculations in this study were performed with the Gaussian 16 software<sup>1</sup>. For comparison purpose, the geometrical structures of the [n]CPP ( $n = 9 - 14$ ), cyclo[18]carbon and their host-guest complexes were optimized by using different density functional methods, i.e.,  $\omega$ B97X-D, M06-2X(D3) and CAM-B3LYP(D3). The def2-SVP basis set was used for all the atoms. The exchange-correlation functionals such as  $\omega$ B97X-D, M06-2X and CAM-B3LYP can well reproduce the bond length alternation character of cyclo[18]carbon. Meanwhile, it is necessary to use dispersion-corrected methods to describe the weak interaction between cyclo[18]carbon and [n]CPP. Vibrational frequency analyses were performed on the optimized structures to ensure that they are local minima on the energy potential surface. The extended basis set def2-TZVP was used for single-point energy calculations to obtain more accurate thermodynamics parameters for the [n]CPP:cyclo[18]carbon complexes, taking into account zero-point energy and basis set superposition error corrections (Table S1).

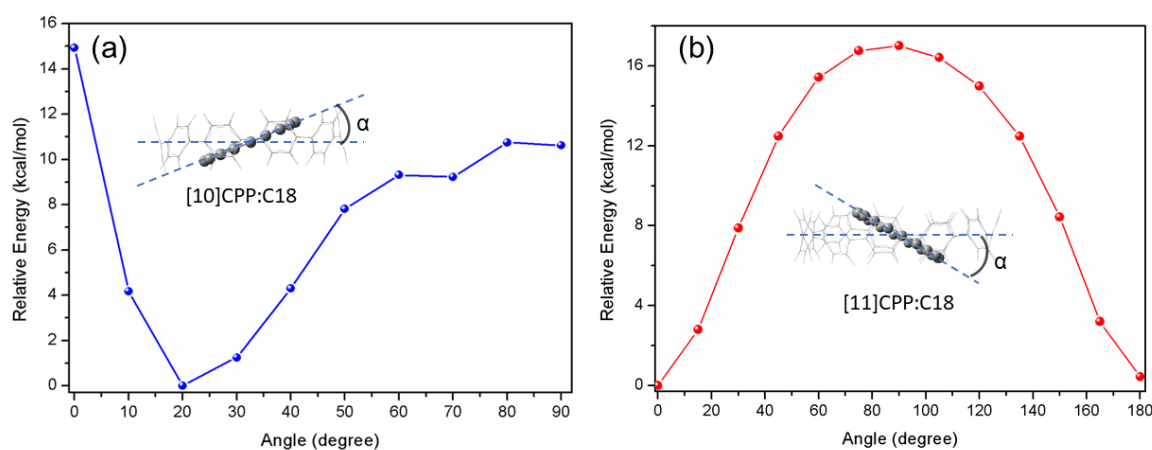

**Fig. S1.** The relative energy of (a) [10]CPP:C<sub>18</sub> and (b) [11]CPP:C<sub>18</sub> for scan of out-of-plane angle of C<sub>18</sub> in [n]CPP calculated at  $\omega$ B97X-D/def2-TZVP level. The insert picture shows the reference system used for the calculations.

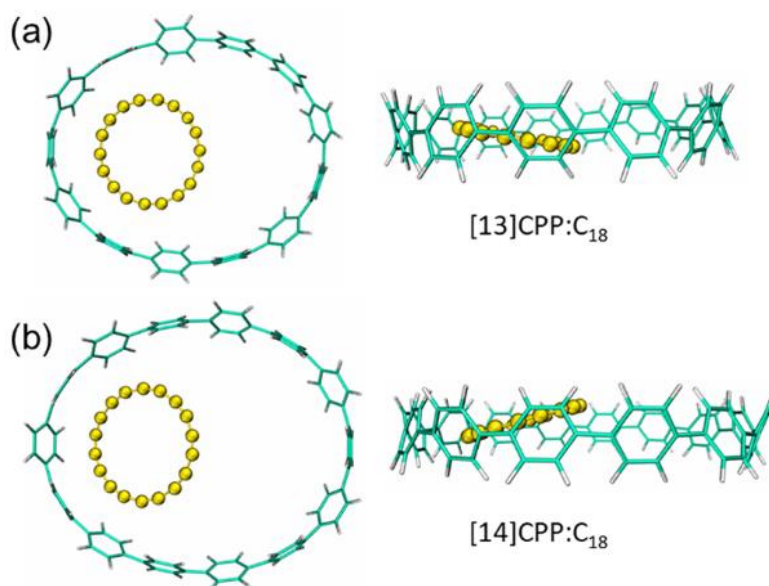

**Fig. S2.** Top view and side view of the  $\omega$ B97X-D/def2-SVP optimized structures of (a) [13]CPP:cyclo[18]carbon, (b) [14]CPP:cyclo[18]carbon.

**Table S1.** The theoretically calculated interaction energies  $E_{\text{int}}$  (in kcal/mol) ( $E_{\text{int}} = E_{\text{complex}} - E_{[n]\text{CPP}} - E_{\text{cyclo}[18]\text{carbon}} + E_{\text{BSSE}}$ ), the changes in enthalpies  $\Delta H$  (in kcal/mol), and the Gibbs energies  $\Delta G$  (in kcal/mol) for the complexation of cyclo[18]carbon and [n]CPP in different methods, taking into account zero-point energy and basis set superposition error corrections ( $T = 298.15$  K). The basis set of def2-SVP was used for structural optimization, and the basis set of def2-TZVP was used for single-point energy calculations.

|                           | $\omega$ B97X-D  |            |            | M06-2X(D3)       |            |            | CAM-B3LYP(D3)    |            |            |
|---------------------------|------------------|------------|------------|------------------|------------|------------|------------------|------------|------------|
|                           | $E_{\text{int}}$ | $\Delta H$ | $\Delta G$ | $E_{\text{int}}$ | $\Delta H$ | $\Delta G$ | $E_{\text{int}}$ | $\Delta H$ | $\Delta G$ |
| [9]CPP : C <sub>18</sub>  | -16.22           | -15.78     | -1.66      | -16.04           | -15.51     | -1.45      | -11.90           | -11.30     | 1.86       |
| [10]CPP : C <sub>18</sub> | -17.19           | -17.00     | -1.48      | -19.58           | -19.42     | -4.33      | -17.82           | -17.33     | -3.73      |
| [11]CPP : C <sub>18</sub> | -20.86           | -20.10     | -7.87      | -18.09           | -17.33     | -5.08      | -21.83           | -20.99     | -9.67      |
| [12]CPP : C <sub>18</sub> | -14.40           | -13.71     | -1.65      | -14.05           | -13.36     | -1.24      | -15.01           | -14.18     | -3.32      |
| [13]CPP : C <sub>18</sub> | -12.63           | -11.87     | -0.49      | -12.23           | -11.59     | 0.93       | -12.82           | -12.00     | -1.22      |
| [14]CPP : C <sub>18</sub> | -10.85           | -10.16     | 1.62       | -10.46           | -9.79      | 2.20       | -11.21           | -10.37     | 0.03       |

To get a better understanding on the interaction between [n]CPP ( $n = 9 - 14$ ) and cyclo[18]carbon, we carried out independent gradient model (IGM) analysis for the complexes based on promolecular density by using Multiwfn 3.7 software. It is known that intermolecular noncovalent interaction regions can be visualized by IGM analysis without any intramolecular interaction interference.

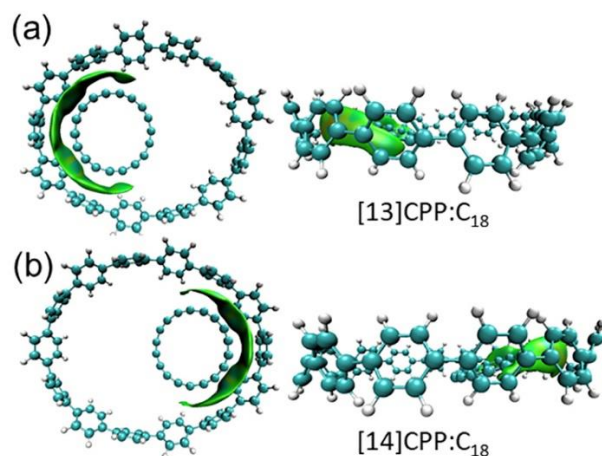

**Fig. S3.** The visualized weak interaction between [n]CPP and cyclo[18]carbon by IGM analysis based on promolecular density. (isovalue = 0.003)

To provide a dynamical description of the [11]CPP:cyclo[18]carbon system, we carried out molecular dynamics (MD) simulations. Firstly, we developed an ad-hoc force field able to describe the structure of the cyclo[18]carbon at MM level. The conjugation that exist in the alternating “single-like” and “triple-like” bonds impedes the use of common atom types developed to describe single and triple bonds (pure polyynic structure). Starting from the optimized geometry of the cyclo[18]carbon a relaxed scan of the “single-like” and “triple-like” bonds was carried out at the  $\omega$ B97X-D/def2-SVP level of theory. The calculated parameters for the bond stretching of the “single-like” and “triple-like” bonds in the cyclo[18]carbon are reported in Table S2. For comparison, parameters calculated at the same level of theory for ethane and ethyne, are reported as reference values. Even if the optimized structure is characterized to a 9-fold symmetry with alternating short and long bonds, i.e., a polyynic structure, bond constants calculations revealed the important contribution from the cumulenic resonance structure in the cyclo[18]carbon, that makes the “single-like” bond parameters more short and rigid compared to the ethane reference structure. The opposite happens to the “triple-like” bond parameters in the cyclo[18]carbon compared to the ethyne reference structure. All the remaining MM parameters of the [11]CPP:cyclo[18]carbon system were defined by using parameters form the Generalised Amber Force Field (GAFF). Using the AMBER 16 software package<sup>2</sup>,

1  $\mu$ s MD simulations of the [11]CPP:cyclo[18]carbon system at different temperatures (25, 50, 75, 100, 200, 300, 400 and 500 K) were carried out.

**Table S2.** Equilibrium length and harmonic constants for “single-like” and “triple-like” bonds in the cyclo[18]carbon with the reference values, calculated at the same level of theory, for ethane and ethyne molecules.

|                                                 | “Single-like” bond in<br>cyclo[18]carbon | “Triple-like” bond in<br>cyclo[18]carbon |
|-------------------------------------------------|------------------------------------------|------------------------------------------|
| <b>Eq. length (Å)</b>                           | 1.36                                     | 1.23                                     |
| <b>K (kcal mol<sup>-1</sup> Å<sup>-2</sup>)</b> | 552.69                                   | 1045.97                                  |
|                                                 | <b>Ethane</b>                            | <b>Ethyne</b>                            |
| <b>Eq. length (Å)</b>                           | 1.52                                     | 1.21                                     |
| <b>K (kcal mol<sup>-1</sup> Å<sup>-2</sup>)</b> | 319.17                                   | 1290.39                                  |

References:

1. Frisch, M. J.; Trucks, G. W.; Schlegel, H. B.; Scuseria, G. E.; Robb, M. A.; Cheeseman, J. R.; Scalmani, G.; Barone, V.; Mennucci, B.; Petersson, G. A.; Nakatsuji, H.; Caricato, M.; Li, X.; Hratchian, H. P.; Izmaylov, A. F.; Bloino, J.; Zheng, G.; Sonnenberg, J. L.; Hada, M.; Ehara, M.; Toyota, K.; Fukuda, R.; Hasegawa, J.; Ishida, M.; Nakajima, T.; Honda, Y.; Kitao, O.; Nakai, H.; Vreven, T.; Montgomery, J. A., Jr.; Peralta, J. E.; Ogliaro, F.; Bearpark, M.; Heyd, J. J.; Brothers, E.; Kudin, K. N.; Staroverov, V. N.; Kobayashi, R.; Normand, J.; Raghavachari, K.; Rendell, A.; Burant, J. C.; Iyengar, S. S.; Tomasi, J.; Cossi, M.; Rega, N.; Millam, J. M.; Klene, M.; Knox, J. E.; Cross, J. B.; Bakken, V.; Adamo, C.; Jaramillo, J.; Gomperts, R.; Stratmann, R. E.; Yazyev, O.; Austin, A. J.; Cammi, R.; Pomelli, C.; Ochterski, J. W.; Martin, R. L.; Morokuma, K.; Zakrzewski, V. G.; Voth, G. A.; Salvador, P.; Dannenberg, J. J.; Dapprich, S.; Daniels, A. D.; Farkas, O.; Foresman, J. B.; Ortiz, J. V.; Cioslowski, J.; Fox, D. J. Gaussian 16, revision A.03. Gaussian, Inc.: Wallingford, CT, 2016.
2. Case, D. A.; Betz, R. M.; Cerutti, D. S.; Cheatham III, T. E.; Darden, T. A.; Duke, R. E.; Giese, T. J.; Gohlke, H.; Goetz, A. W.; Homeyer, N. and Izadi, S.; Janowski, P.; Kaus, J.; Kovalenko, A.; Lee, T. S.; LeGrand, S.; Li, P.; Lin, C.; Luchko, T.; Luo, R.; Madej, B.; Mermelstein, D.; Merz, K. M.; Monard, G.; Nguyen, H.; Nguyen, H. T.; Omelyan, I.; Onufriev, A.; Roe, D. R.; Roitberg, A.; Sagui, C.; Simmeling, C. L.; Botello-Smith, W. M.; Swails, J.; Walker, R. C.; Wang, J.; Wolf, R. M.; Wu, X.; Xiao, L.; Kollman, P. A. (2016) 944 AMBER 2016. University of California, San Francisco.

---

## (2) Cartesian Coordinates (in Angstrom) of DFT-Optimized Structures:

[9]CPP : cyclo[18]carbon

HF = - 2764.6675817 a.u. (in  $\omega$ B97X-D/def-TZVP// $\omega$ B97X-D/def2-SVP level)

|   |             |             |             |
|---|-------------|-------------|-------------|
| C | 2.78775700  | -5.25750400 | 0.71899100  |
| C | 3.59574300  | -5.15395600 | 1.86372400  |
| C | 4.71683100  | -4.33143700 | 1.87921500  |
| C | 5.08400200  | -3.59240000 | 0.74377500  |
| C | 4.41356200  | -3.88107900 | -0.45182300 |
| C | 3.27982600  | -4.68788400 | -0.46347600 |
| C | 5.86348900  | -2.32754200 | 0.84051300  |
| C | 5.57943800  | -1.48186000 | 1.92114900  |
| C | 5.86994100  | -0.12636900 | 1.86957300  |
| C | 6.46975900  | 0.45287300  | 0.74098500  |
| C | 6.93210600  | -0.42913800 | -0.24972900 |
| C | 6.62712300  | -1.78896900 | -0.20679500 |
| C | 6.26100000  | 1.91139100  | 0.50742600  |
| C | 5.90384500  | 2.77415300  | 1.55618800  |
| C | 5.13012100  | 3.90464900  | 1.32354300  |
| C | 4.71054700  | 4.24593800  | 0.02812700  |
| C | 5.31134600  | 3.54622800  | -1.02872600 |
| C | 6.05705000  | 2.39524700  | -0.79446600 |
| C | 2.62650100  | 4.73437100  | -1.24267100 |
| C | 1.30040700  | 5.14488400  | -1.26527900 |
| C | 0.75296000  | 5.88816900  | -0.21101600 |
| C | 1.63140600  | 6.32781400  | 0.79025000  |
| C | 2.96501800  | 5.92565100  | 0.80483300  |
| C | -0.72723900 | 5.94601100  | -0.08431800 |

---

|   |             |             |             |
|---|-------------|-------------|-------------|
| C | -1.32058000 | 5.62805900  | 1.14406300  |
| C | -2.65598000 | 5.24642500  | 1.21686700  |
| C | -3.45801500 | 5.17610400  | 0.06813000  |
| C | -2.91092500 | 5.67867100  | -1.12353000 |
| C | -1.57216100 | 6.04819900  | -1.20013300 |
| C | -4.68143100 | 4.32752700  | 0.08913100  |
| C | -4.99095100 | 3.54030500  | -1.02855400 |
| C | -5.76946800 | 2.39391800  | -0.90848900 |
| C | -6.25957700 | 1.97951000  | 0.33767100  |
| C | -6.14886700 | 2.89392100  | 1.39827300  |
| C | -5.37851200 | 4.04485600  | 1.27576100  |
| C | 3.47417800  | 5.05319000  | -0.17074300 |
| C | -6.50787100 | 0.52873000  | 0.56574800  |
| C | -5.99444500 | -0.04176000 | 1.73961900  |
| C | -5.72185900 | -1.40078600 | 1.82220300  |
| C | -5.94598600 | -2.25465700 | 0.73351800  |
| C | -6.63296900 | -1.71751200 | -0.36760600 |
| C | -6.91093700 | -0.35440600 | -0.44817600 |
| C | -5.18356500 | -3.53311000 | 0.68403600  |
| C | -4.52726800 | -3.88432600 | -0.50264700 |
| C | -3.40551000 | -4.70689000 | -0.48920500 |
| C | -2.91093000 | -5.23432800 | 0.71116200  |
| C | -3.71236600 | -5.07520700 | 1.85456700  |
| C | -4.82091100 | -4.23587900 | 1.84424400  |
| C | -1.48719900 | -5.66107700 | 0.80135600  |
| C | -0.76114100 | -6.15996900 | -0.29207200 |
| C | 0.63203000  | -6.16376700 | -0.29238300 |

---

|   |             |             |             |
|---|-------------|-------------|-------------|
| C | 1.36006400  | -5.67146500 | 0.80219700  |
| C | 0.63153400  | -5.31981200 | 1.94740800  |
| C | -0.75670900 | -5.31402000 | 1.94673500  |
| H | 3.29881000  | -5.66222600 | 2.78413100  |
| H | 5.26977400  | -4.20104200 | 2.81282500  |
| H | 4.69105900  | -3.35390200 | -1.36576700 |
| H | 2.69777700  | -4.75720200 | -1.38549400 |
| H | 4.99162100  | -1.85837500 | 2.76054700  |
| H | 5.49100900  | 0.50645100  | 2.67282500  |
| H | 7.46794800  | -0.04071900 | -1.11890000 |
| H | 6.92801800  | -2.42757300 | -1.04123900 |
| H | 6.12665300  | 2.50133000  | 2.58942500  |
| H | 4.74414500  | 4.45324100  | 2.18499600  |
| H | 5.09965400  | 3.82830600  | -2.06203800 |
| H | 6.36355700  | 1.79546800  | -1.65356100 |
| H | 2.96651300  | 4.04899500  | -2.02039800 |
| H | 0.64878900  | 4.77717000  | -2.06073100 |
| H | 1.25517800  | 6.95694600  | 1.60076600  |
| H | 3.60352100  | 6.25457500  | 1.62786400  |
| H | -0.69851800 | 5.54758900  | 2.03842000  |
| H | -3.03782500 | 4.87348100  | 2.16916300  |
| H | -3.52183900 | 5.71853700  | -2.02817800 |
| H | -1.16007300 | 6.36444100  | -2.16153600 |
| H | -4.49711800 | 3.73031100  | -1.98326100 |
| H | -5.85274800 | 1.73021900  | -1.77107500 |
| H | -6.60017800 | 2.66017800  | 2.36550000  |
| H | -5.25146100 | 4.68947300  | 2.14850900  |



---

|   |             |             |             |
|---|-------------|-------------|-------------|
| H | -5.66572100 | 0.60341200  | 2.55651300  |
| H | -5.19317800 | -1.77322800 | 2.70164700  |
| H | -6.89142700 | -2.36173200 | -1.21172200 |
| H | -7.37788100 | 0.03732500  | -1.35520300 |
| H | -4.80292600 | -3.39457000 | -1.43743200 |
| H | -2.83285300 | -4.82129500 | -1.41235100 |
| H | -3.41986400 | -5.55237900 | 2.79277100  |
| H | -5.36678600 | -4.06572800 | 2.77547900  |
| H | -1.29040200 | -6.50032900 | -1.18532800 |
| H | 1.16063500  | -6.50559300 | -1.18558600 |
| H | 1.15362700  | -4.92455400 | 2.82076700  |
| H | -1.27515400 | -4.91359200 | 2.81976800  |
| C | 3.45565200  | 0.51728600  | -0.65850300 |
| C | 2.85948200  | 1.37689900  | 0.19742700  |
| C | 1.94733700  | 1.97704400  | 0.76987000  |
| C | 0.71118100  | 2.37123800  | 1.15480900  |
| C | -0.52219400 | 2.33998200  | 1.17417100  |
| C | -1.79594600 | 1.97302700  | 0.90036700  |
| C | -2.69205900 | 1.32536400  | 0.35342400  |
| C | -3.33326700 | 0.44759600  | -0.45128500 |
| C | -3.51614800 | -0.41067900 | -1.31678600 |
| C | -3.31774500 | -1.32792000 | -2.29103500 |
| C | -2.74031600 | -2.07576100 | -3.08352000 |
| C | -1.76828900 | -2.72984700 | -3.76218300 |
| C | -0.61935600 | -3.03521400 | -4.09153900 |
| C | 0.73333100  | -3.04963200 | -4.15416200 |
| C | 1.87429000  | -2.68948400 | -3.85209100 |

|   |            |             |             |
|---|------------|-------------|-------------|
| C | 2.90543500 | -2.04193400 | -3.26111700 |
| C | 3.44369600 | -1.25241600 | -2.47997900 |
| C | 3.69031400 | -0.32580100 | -1.52736400 |

[10]CPP : cyclo[18]carbon

HF = -2995.7389156 a.u. (in  $\omega$ B97X-D/def-TZVP// $\omega$ B97X-D/def2-SVP level)

|   |            |             |             |
|---|------------|-------------|-------------|
| C | 2.82499900 | -6.16991500 | -0.21210600 |
| C | 3.69591200 | -6.20623000 | 0.88919900  |
| C | 4.84428800 | -5.41911200 | 0.92921900  |
| C | 5.17568900 | -4.56118400 | -0.13105600 |
| C | 4.38207700 | -4.63599100 | -1.28449900 |
| C | 3.23578800 | -5.41862300 | -1.32297800 |
| C | 6.12466500 | -3.42223700 | 0.00574600  |
| C | 6.18779300 | -2.71508500 | 1.21414700  |
| C | 6.67130500 | -1.41170700 | 1.25958400  |
| C | 7.11792600 | -0.75780200 | 0.10209900  |
| C | 7.25079900 | -1.54250700 | -1.05540700 |
| C | 6.76154500 | -2.84334700 | -1.10378500 |
| C | 7.12553300 | 0.73236100  | 0.05896700  |
| C | 6.75530500 | 1.39454700  | -1.12097000 |
| C | 6.27756300 | 2.70137800  | -1.09890400 |
| C | 6.13959300 | 3.40117900  | 0.10653500  |
| C | 6.71488700 | 2.81724700  | 1.24746700  |
| C | 7.20013400 | 1.51456600  | 1.22372100  |
| C | 5.16928700 | 4.52658900  | 0.20598500  |
| C | 4.32829600 | 4.57673100  | 1.32721900  |

---

|   |             |             |             |
|---|-------------|-------------|-------------|
| C | 3.18321500  | 5.36064900  | 1.33924000  |
| C | 2.81570500  | 6.14051100  | 0.23236500  |
| C | 3.71752000  | 6.18320800  | -0.84275400 |
| C | 4.86748600  | 5.39401700  | -0.85579300 |
| C | 0.69592600  | 6.61620600  | -1.03037400 |
| C | -0.69849400 | 6.61717800  | -1.03042300 |
| C | -1.42268600 | 6.65990300  | 0.16837100  |
| C | -0.69537100 | 6.94164200  | 1.33750000  |
| C | 0.69316800  | 6.94021900  | 1.33759400  |
| C | -2.81894000 | 6.14472800  | 0.23215200  |
| C | -3.18777600 | 5.36636800  | 1.33968400  |
| C | -4.33210200 | 4.58146400  | 1.32684700  |
| C | -5.17090200 | 4.52854200  | 0.20405900  |
| C | -4.86875000 | 5.39562800  | -0.85789800 |
| C | -3.71962300 | 6.18603200  | -0.84396400 |
| C | -6.13881700 | 3.40111200  | 0.10363300  |
| C | -6.27542600 | 2.70160700  | -1.10213100 |
| C | -6.75173800 | 1.39423300  | -1.12509100 |
| C | -7.12157800 | 0.73080100  | 0.05427700  |
| C | -7.19640600 | 1.51211800  | 1.21968400  |
| C | -6.71299400 | 2.81539900  | 1.24424500  |
| C | 1.42009900  | 6.65737400  | 0.16851800  |
| C | -7.11638600 | -0.75948100 | 0.09604300  |
| C | -6.67712900 | -1.41646400 | 1.25456600  |
| C | -6.19539200 | -2.72064000 | 1.20903000  |
| C | -6.12713500 | -3.42527800 | -0.00045500 |
| C | -6.75877300 | -2.84369800 | -1.11162600 |

---

|   |             |             |             |
|---|-------------|-------------|-------------|
| C | -7.24599300 | -1.54223900 | -1.06323000 |
| C | -5.17720300 | -4.56349100 | -0.13686200 |
| C | -4.37970100 | -4.63371400 | -1.28792000 |
| C | -3.23305300 | -5.41573900 | -1.32547700 |
| C | -2.82589200 | -6.17097600 | -0.21601000 |
| C | -3.70007200 | -6.21138700 | 0.88251700  |
| C | -4.84881100 | -5.42470300 | 0.92167700  |
| C | -1.42217200 | -6.66727200 | -0.16430600 |
| C | -0.69377400 | -6.93808100 | -1.33588800 |
| C | 0.69457600  | -6.93781300 | -1.33494000 |
| C | 1.42131800  | -6.66673700 | -0.16239500 |
| C | 0.69514100  | -6.62284500 | 1.03428000  |
| C | -0.69780100 | -6.62301700 | 1.03335800  |
| H | 3.44989700  | -6.82537400 | 1.75513300  |
| H | 5.46760100  | -5.43653000 | 1.82651100  |
| H | 4.59342900  | -3.97775500 | -2.12948800 |
| H | 2.58862800  | -5.34707000 | -2.19874000 |
| H | 5.71942300  | -3.13035000 | 2.10928200  |
| H | 6.55886500  | -0.85382800 | 2.19075600  |
| H | 7.67729300  | -1.10817800 | -1.96231600 |
| H | 6.81463900  | -3.39436300 | -2.04573300 |
| H | 6.69695000  | 0.84167300  | -2.06027000 |
| H | 5.86369400  | 3.11995900  | -2.01870900 |
| H | 6.71797700  | 3.36474300  | 2.19290100  |
| H | 7.57386800  | 1.07635800  | 2.15176500  |
| H | 4.50713400  | 3.90336800  | 2.16739500  |
| H | 2.50547700  | 5.27468200  | 2.19011700  |

---

|   |             |             |             |
|---|-------------|-------------|-------------|
| H | 3.49900200  | 6.81259000  | -1.70882100 |
| H | 5.51931100  | 5.42402200  | -1.73232400 |
| H | 1.21699900  | 6.43347700  | -1.97269200 |
| H | -1.21975000 | 6.43452000  | -1.97269200 |
| H | -1.22328500 | 7.09392400  | 2.28155000  |
| H | 1.22130300  | 7.09138700  | 2.28170600  |
| H | -2.51128600 | 5.28190500  | 2.19168700  |
| H | -4.51140800 | 3.90891900  | 2.16756000  |
| H | -5.51930800 | 5.42413600  | -1.73541500 |
| H | -3.50039700 | 6.81457600  | -1.71044900 |
| H | -5.86194300 | 3.12120300  | -2.02166600 |
| H | -6.69303700 | 0.84243600  | -2.06496000 |
| H | -7.56978900 | 1.07305200  | 2.14744200  |
| H | -6.71703000 | 3.36223600  | 2.19003800  |
| H | -6.56815400 | -0.86061900 | 2.18736400  |
| H | -5.73173800 | -3.13817600 | 2.10560100  |
| H | -6.80879400 | -3.39310300 | -2.05467400 |
| H | -7.66824600 | -1.10603300 | -1.97119200 |
| H | -4.58840000 | -3.97236300 | -2.13110400 |
| H | -2.58290500 | -5.34089400 | -2.19875700 |
| H | -3.45624300 | -6.83326000 | 1.74712400  |
| H | -5.47492400 | -5.44517900 | 1.81696700  |
| H | -1.22073800 | -7.08571000 | -2.28116800 |
| H | 1.22274800  | -7.08531100 | -2.27955800 |
| H | 1.21264800  | -6.43562800 | 1.97758500  |
| H | -1.21683200 | -6.43570000 | 1.97586300  |
| C | -2.84502100 | -2.22026700 | 0.65309300  |

|   |             |             |             |
|---|-------------|-------------|-------------|
| C | -3.52893900 | -1.12415700 | 0.25720100  |
| C | -3.70803400 | 0.02935100  | -0.14080200 |
| C | -3.47486900 | 1.29278300  | -0.55919700 |
| C | -2.84193100 | 2.29652800  | -0.89223500 |
| C | -1.82366400 | 3.13780100  | -1.17885500 |
| C | -0.65113800 | 3.49404800  | -1.31426200 |
| C | 0.69985900  | 3.50979200  | -1.33004000 |
| C | 1.84882000  | 3.08643600  | -1.18646000 |
| C | 2.89432900  | 2.27290700  | -0.92085900 |
| C | 3.47140600  | 1.23857400  | -0.57832200 |
| C | 3.73930400  | -0.01746200 | -0.15886900 |
| C | 3.49362400  | -1.15725100 | 0.24350200  |
| C | 2.83984400  | -2.26658000 | 0.65398700  |
| C | 1.86837500  | -2.97484000 | 0.93046800  |
| C | 0.59820400  | -3.40255400 | 1.10098300  |
| C | -0.63455800 | -3.37409200 | 1.09199700  |
| C | -1.91937100 | -2.98285800 | 0.94244800  |

[11]CPP : cyclo[18]carbon

HF = -3226.8039601 a.u. (in  $\omega$ B97X-D/def-TZVP// $\omega$ B97X-D/def2-SVP level)

|   |             |             |             |
|---|-------------|-------------|-------------|
| C | -1.39484100 | -7.24637100 | -0.14172900 |
| C | -0.79031900 | -7.31573500 | 1.12199700  |
| C | 0.59174300  | -7.32737800 | 1.26195000  |
| C | 1.43468600  | -7.23747000 | 0.14523900  |
| C | 0.83059500  | -7.31190600 | -1.11840800 |
| C | -0.55138000 | -7.33233200 | -1.25833300 |

---

|   |            |             |             |
|---|------------|-------------|-------------|
| C | 2.86019000 | -6.83839900 | 0.27298400  |
| C | 3.25566600 | -6.04760600 | 1.36070200  |
| C | 4.45942000 | -5.35718900 | 1.34796700  |
| C | 5.31409700 | -5.41863200 | 0.23994200  |
| C | 4.99142600 | -6.32078600 | -0.78272700 |
| C | 3.79105900 | -7.02385700 | -0.76104600 |
| C | 6.33360000 | -4.35113300 | 0.08843100  |
| C | 6.36529100 | -3.62276400 | -1.10718400 |
| C | 6.95879600 | -2.36750100 | -1.16049300 |
| C | 7.54673600 | -1.80017800 | -0.02227300 |
| C | 7.66898300 | -2.60584900 | 1.11970000  |
| C | 7.06847900 | -3.85830700 | 1.17602500  |
| C | 7.74547800 | -0.32945000 | 0.02420600  |
| C | 7.32851400 | 0.36451400  | 1.16771300  |
| C | 7.10569300 | 1.73434900  | 1.13134700  |
| C | 7.28893900 | 2.46258700  | -0.05096900 |
| C | 7.85690100 | 1.79668400  | -1.14675900 |
| C | 8.08280500 | 0.42486500  | -1.10926200 |
| C | 5.87270700 | 4.06492200  | -1.31281300 |
| C | 4.93144500 | 5.08669300  | -1.31307700 |
| C | 4.71935400 | 5.87038300  | -0.17166300 |
| C | 5.59348100 | 5.69836200  | 0.91126300  |
| C | 6.53656000 | 4.67672800  | 0.91122600  |
| C | 3.45160700 | 6.63282200  | -0.05398800 |
| C | 2.70482700 | 6.51529800  | 1.12576500  |
| C | 1.36511900 | 6.88009500  | 1.16322600  |
| C | 0.72111400 | 7.37787400  | 0.02293100  |

---

|   |             |             |             |
|---|-------------|-------------|-------------|
| C | 1.50598300  | 7.63195400  | -1.11128000 |
| C | 2.84685500  | 7.26496300  | -1.14973300 |
| C | -0.76224900 | 7.37434400  | -0.02199000 |
| C | -1.40381600 | 6.87273200  | -1.16195700 |
| C | -2.74173400 | 6.50145200  | -1.12430500 |
| C | -3.48915700 | 6.61613700  | 0.05532700  |
| C | -2.88747000 | 7.25192000  | 1.15068800  |
| C | -1.54837400 | 7.62531100  | 1.11205100  |
| C | -4.75343600 | 5.84793300  | 0.17314000  |
| C | -4.96349300 | 5.06563100  | 1.31586800  |
| C | -5.89872500 | 4.03829600  | 1.31577600  |
| C | -6.65895700 | 3.75705400  | 0.17308200  |
| C | -6.56196600 | 4.64201300  | -0.91059400 |
| C | -5.62492800 | 5.66911800  | -0.91083700 |
| C | 6.63716000  | 3.79068100  | -0.17120500 |
| C | -7.30141300 | 2.42438000  | 0.05307200  |
| C | -7.11256100 | 1.69711000  | -1.12897200 |
| C | -7.32643600 | 0.32587700  | -1.16532500 |
| C | -7.73974200 | -0.37058900 | -0.02204000 |
| C | -8.08231600 | 0.38159400  | 1.11125600  |
| C | -7.86545200 | 1.75487600  | 1.14870700  |
| C | -7.53257100 | -1.84012900 | 0.02443200  |
| C | -6.94090100 | -2.40403400 | 1.16242300  |
| C | -6.34159600 | -3.65654700 | 1.10925800  |
| C | -6.30769500 | -4.38555600 | -0.08592800 |
| C | -7.04543500 | -3.89652300 | -1.17329400 |
| C | -7.65163900 | -2.64679100 | -1.11716100 |



---

|   |             |             |             |
|---|-------------|-------------|-------------|
| C | -5.28377200 | -5.44881000 | -0.23736600 |
| C | -4.43000300 | -5.38437400 | -1.34593600 |
| C | -3.22275200 | -6.06862400 | -1.35844500 |
| C | -2.82268800 | -6.85591800 | -0.26987000 |
| C | -3.75233400 | -7.04542800 | 0.76451300  |
| C | -4.95629600 | -6.34850900 | 0.78592900  |
| H | -1.40502200 | -7.27330700 | 2.02299300  |
| H | 1.01654900  | -7.33600300 | 2.26751400  |
| H | 1.44506500  | -7.26668500 | -2.01943500 |
| H | -0.97620200 | -7.34457000 | -2.26385500 |
| H | 2.56427000  | -5.86801900 | 2.18525100  |
| H | 4.67969600  | -4.66048200 | 2.15967900  |
| H | 5.66575500  | -6.43487100 | -1.63506300 |
| H | 3.55291800  | -7.68762500 | -1.59504600 |
| H | 5.80280700  | -3.98220300 | -1.97179800 |
| H | 6.84771100  | -1.76894300 | -2.06712200 |
| H | 8.18464700  | -2.21923300 | 2.00196700  |
| H | 7.11502000  | -4.43644200 | 2.10217600  |
| H | 7.05236700  | -0.19062200 | 2.06643000  |
| H | 6.66126300  | 2.22090800  | 2.00208500  |
| H | 8.07147100  | 2.35062000  | -2.06389800 |
| H | 8.47269800  | -0.07788900 | -1.99759200 |
| H | 5.92482800  | 3.39246800  | -2.17180300 |
| H | 4.26549900  | 5.19252000  | -2.17211600 |
| H | 5.49499800  | 6.33764400  | 1.79193800  |
| H | 7.16597200  | 4.52764100  | 1.79187100  |
| H | 3.14370800  | 6.02063500  | 1.99482700  |

---

|   |             |             |             |
|---|-------------|-------------|-------------|
| H | 0.78292200  | 6.66265100  | 2.06106900  |
| H | 1.04731800  | 8.07715700  | -1.99737500 |
| H | 3.42089600  | 7.42543900  | -2.06551300 |
| H | -0.82053200 | 6.65746900  | -2.05962200 |
| H | -3.17816100 | 6.00415900  | -1.99309900 |
| H | -3.46232500 | 7.41038000  | 2.06630600  |
| H | -1.09189900 | 8.07329800  | 1.99787700  |
| H | -4.29979800 | 5.17690900  | 2.17595500  |
| H | -5.94844700 | 3.36718300  | 2.17596100  |
| H | -7.18897700 | 4.48776200  | -1.79205500 |
| H | -5.52864600 | 6.30736000  | -1.79250500 |
| H | -6.67069300 | 2.18640300  | -1.99947400 |
| H | -7.04619800 | -0.22758500 | -2.06381100 |
| H | -8.46932500 | -0.12367700 | 1.99942100  |
| H | -8.08420400 | 2.30750400  | 2.06564600  |
| H | -6.83207100 | -1.80451200 | 2.06869300  |
| H | -5.77684600 | -4.01291800 | 1.97365800  |
| H | -7.08998200 | -4.47531400 | -2.09913500 |
| H | -8.16973400 | -2.26297400 | -1.99922700 |
| H | -4.65415200 | -4.68960400 | -2.15825000 |
| H | -2.53242300 | -5.88633400 | -2.18329800 |
| H | -3.51042300 | -7.70707800 | 1.59910700  |
| H | -5.62969900 | -6.46512100 | 1.63865400  |
| C | 0.62713000  | 3.64393200  | -0.00550900 |
| C | 1.90985300  | 3.20340100  | -0.01376900 |
| C | 2.84348500  | 2.39562100  | -0.02206400 |
| C | 3.54579900  | 1.23495700  | -0.03038700 |

|   |             |             |             |
|---|-------------|-------------|-------------|
| C | 3.73366500  | 0.01448900  | -0.03162600 |
| C | 3.51317400  | -1.32418200 | -0.02853000 |
| C | 2.86318400  | -2.37414000 | -0.02504900 |
| C | 1.83112200  | -3.25416900 | -0.02081900 |
| C | 0.66127400  | -3.64852800 | -0.01215300 |
| C | -0.69479800 | -3.66773600 | -0.00251600 |
| C | -1.84504400 | -3.21938400 | 0.00685800  |
| C | -2.90091100 | -2.36794700 | 0.01336500  |
| C | -3.50075600 | -1.28868200 | 0.01903600  |
| C | -3.76052900 | 0.04293800  | 0.02407700  |
| C | -3.51561300 | 1.25326200  | 0.02287600  |
| C | -2.84769700 | 2.43397200  | 0.01600300  |
| C | -1.87725700 | 3.19726600  | 0.00903000  |
| C | -0.60704900 | 3.67270400  | 0.00200400  |

[12]CPP : cyclo[18]carbon

HF = -3457.8580604 a.u. (in  $\omega$ B97X-D/def-TZVP// $\omega$ B97X-D/def2-SVP level)

|   |             |             |             |
|---|-------------|-------------|-------------|
| C | 5.13494600  | -6.12457900 | 0.04911100  |
| C | 4.63185300  | -6.78660800 | -1.08110100 |
| C | 3.35560900  | -7.33676700 | -1.08062400 |
| C | 2.53196100  | -7.25405800 | 0.05219100  |
| C | 3.08794000  | -6.71734900 | 1.22027100  |
| C | 4.36206700  | -6.16236700 | 1.21773700  |
| C | 1.07440800  | -7.53180000 | -0.01258100 |
| C | 0.34959400  | -7.13993000 | -1.14618600 |
| C | -1.04002100 | -7.13487900 | -1.14340500 |

---

|   |             |             |             |
|---|-------------|-------------|-------------|
| C | -1.76199500 | -7.51942900 | -0.00599100 |
| C | -1.03902500 | -8.00751200 | 1.09200100  |
| C | 0.35207600  | -8.01437700 | 1.08842800  |
| C | -3.21517900 | -7.22019600 | 0.06794000  |
| C | -3.73474900 | -6.61555900 | 1.21991800  |
| C | -4.99996400 | -6.04038800 | 1.21785900  |
| C | -5.79710200 | -6.04832700 | 0.06492700  |
| C | -5.32962100 | -6.76831500 | -1.04420300 |
| C | -4.06191700 | -7.34149600 | -1.04340600 |
| C | -6.95166200 | -5.11606300 | -0.01862600 |
| C | -7.11210100 | -4.33746600 | -1.17244000 |
| C | -7.90927800 | -3.19949500 | -1.16308700 |
| C | -8.57842000 | -2.79452200 | 0.00001700  |
| C | -8.54849200 | -3.66340600 | 1.10107200  |
| C | -7.74920300 | -4.80236700 | 1.09212300  |
| C | -8.70514100 | -0.66120100 | 1.26559900  |
| C | -8.69154000 | 0.72820100  | 1.26528000  |
| C | -8.99830600 | 1.45329800  | 0.10598100  |
| C | -9.49154300 | 0.73643100  | -0.99471500 |
| C | -9.50516900 | -0.65492500 | -0.99440200 |
| C | -8.52501700 | 2.85862500  | -0.00107900 |
| C | -7.85005100 | 3.25203700  | -1.16481100 |
| C | -7.03570600 | 4.37781100  | -1.17578300 |
| C | -6.86296700 | 5.15505200  | -0.02287100 |
| C | -7.66308500 | 4.85354700  | 1.08934400  |
| C | -8.47984700 | 3.72708700  | 1.09975200  |
| C | -5.69787000 | 6.07427600  | 0.05760100  |

---

|   |             |             |             |
|---|-------------|-------------|-------------|
| C | -4.89652500 | 6.05620400  | 1.20745200  |
| C | -3.62767700 | 6.62320900  | 1.20713200  |
| C | -3.10879100 | 7.23005400  | 0.05603500  |
| C | -3.95774000 | 7.35901300  | -1.05270600 |
| C | -5.22887200 | 6.79346700  | -1.05135400 |
| C | -1.65509100 | 7.52604900  | -0.01943100 |
| C | -0.93546400 | 7.14587600  | -1.16016900 |
| C | 0.45421100  | 7.14639300  | -1.16417800 |
| C | 1.18164700  | 7.52876300  | -0.02883200 |
| C | 0.46193400  | 8.01007600  | 1.07417000  |
| C | -0.92934700 | 8.00788700  | 1.07928000  |
| C | -9.02600500 | -1.38074800 | 0.10663500  |
| C | 2.63484900  | 7.23048900  | 0.03926500  |
| C | 3.17653800  | 6.68199700  | 1.20931100  |
| C | 4.43922500  | 6.10088600  | 1.21134000  |
| C | 5.21493100  | 6.04531600  | 0.04493700  |
| C | 4.72850300  | 6.71636600  | -1.08696900 |
| C | 3.46386100  | 7.29464600  | -1.09054200 |
| C | 6.35907000  | 5.09990700  | -0.02464200 |
| C | 6.54418300  | 4.33355600  | -1.18334700 |
| C | 7.33063100  | 3.18815500  | -1.16919600 |
| C | 7.96554900  | 2.75981300  | 0.00460900  |
| C | 7.91083200  | 3.61374400  | 1.11660300  |
| C | 7.12369600  | 4.76044100  | 1.10198300  |
| C | 8.41181700  | 1.34608200  | 0.10414700  |
| C | 8.11037600  | 0.62149700  | 1.26477300  |
| C | 8.10626600  | -0.76778300 | 1.26201700  |

---

|   |             |             |             |
|---|-------------|-------------|-------------|
| C | 8.40502600  | -1.49023500 | 0.09869400  |
| C | 8.87558500  | -0.76656300 | -1.00770100 |
| C | 8.87835500  | 0.62427600  | -1.00502100 |
| C | 7.95411600  | -2.90254200 | -0.00298500 |
| C | 7.87972400  | -3.74884200 | 1.11390500  |
| C | 7.07052600  | -4.87918300 | 1.10313500  |
| C | 6.30283400  | -5.20859600 | -0.02478600 |
| C | 6.51640200  | -4.46020000 | -1.19011000 |
| C | 7.32635800  | -3.33140600 | -1.17959900 |
| H | 5.23179000  | -6.83527200 | -1.99269700 |
| H | 2.97663200  | -7.80830300 | -1.99035200 |
| H | 2.47540600  | -6.63176400 | 2.12044700  |
| H | 4.71295400  | -5.64963900 | 2.11558000  |
| H | 0.87900100  | -6.74306800 | -2.01517800 |
| H | -1.57167900 | -6.73462600 | -2.00945500 |
| H | -1.57464300 | -8.36063500 | 1.97651400  |
| H | 0.88773900  | -8.37531400 | 1.96964100  |
| H | -3.10005000 | -6.50003400 | 2.10136000  |
| H | -5.32872400 | -5.48159400 | 2.09671400  |
| H | -5.94996700 | -6.84284100 | -1.94063100 |
| H | -3.70698500 | -7.85895700 | -1.93799400 |
| H | -6.50920900 | -4.55245600 | -2.05731800 |
| H | -7.90931300 | -2.54860700 | -2.03994600 |
| H | -9.11195700 | -3.41293100 | 2.00322200  |
| H | -7.70035400 | -5.42834100 | 1.98647800  |
| H | -8.33219600 | -1.19123800 | 2.14455100  |
| H | -8.30837800 | 1.25122300  | 2.14403300  |

---

|   |             |             |             |
|---|-------------|-------------|-------------|
| H | -9.80803100 | 1.27356200  | -1.89219200 |
| H | -9.83199100 | -1.18616400 | -1.89168200 |
| H | -7.86112400 | 2.60068300  | -2.04125600 |
| H | -6.43083400 | 4.58367900  | -2.06151200 |
| H | -7.60370800 | 5.47936400  | 1.98317200  |
| H | -9.04637300 | 3.48599900  | 2.00253000  |
| H | -5.22628200 | 5.49682000  | 2.08556800  |
| H | -2.99062700 | 6.50042900  | 2.08587200  |
| H | -3.60258800 | 7.87746400  | -1.94662600 |
| H | -5.85177400 | 6.87463600  | -1.94543100 |
| H | -1.46955000 | 6.75252900  | -2.02796100 |
| H | 0.98119700  | 6.75006600  | -2.03469500 |
| H | 0.99918500  | 8.36419300  | 1.95717700  |
| H | -1.46273700 | 8.35870500  | 1.96603200  |
| H | 2.55955800  | 6.60845000  | 2.10742700  |
| H | 4.77675800  | 5.58122700  | 2.11030000  |
| H | 5.33090900  | 6.74956300  | -1.99767900 |
| H | 3.09767400  | 7.77187200  | -2.00253700 |
| H | 5.96588500  | 4.56061900  | -2.08109100 |
| H | 7.34551700  | 2.55036600  | -2.05530300 |
| H | 8.44883500  | 3.34864500  | 2.02982800  |
| H | 7.06169300  | 5.37426100  | 2.00360800  |
| H | 7.74208300  | 1.14517700  | 2.14922300  |
| H | 7.73607500  | -1.29268000 | 2.14496800  |
| H | 9.18725100  | -1.29818100 | -1.90990900 |
| H | 9.19133800  | 1.15800800  | -1.90555400 |
| H | 8.41673100  | -3.48728500 | 2.02871400  |

|   |             |             |             |
|---|-------------|-------------|-------------|
| H | 6.99162200  | -5.48548100 | 2.00845800  |
| H | 5.94148200  | -4.68348900 | -2.09107900 |
| H | 7.35891700  | -2.70145900 | -2.07080900 |
| C | -0.46597700 | -3.24351800 | -0.25001000 |
| C | -1.50395400 | -2.37270200 | -0.27300800 |
| C | -2.09299300 | -1.28814500 | -0.27698100 |
| C | -2.36565900 | 0.03942400  | -0.26828100 |
| C | -2.16709600 | 1.25721300  | -0.24474600 |
| C | -1.56891900 | 2.47294000  | -0.20758100 |
| C | -0.64062400 | 3.28514800  | -0.16348100 |
| C | 0.60759800  | 3.80994900  | -0.11037300 |
| C | 1.84061600  | 3.77799900  | -0.06441400 |
| C | 3.11626800  | 3.32666800  | -0.01940900 |
| C | 4.03402100  | 2.50265400  | 0.01349300  |
| C | 4.73565000  | 1.34518300  | 0.03328600  |
| C | 4.94568900  | 0.12936500  | 0.03295200  |
| C | 4.77051300  | -1.21312900 | 0.01439600  |
| C | 4.17411200  | -2.29247700 | -0.03081800 |
| C | 3.18760500  | -3.21774600 | -0.10133200 |
| C | 2.03579600  | -3.65657700 | -0.16337300 |
| C | 0.68247800  | -3.69449800 | -0.21643500 |

[13]CPP : cyclo[18]carbon

HF = -3688.9136548 a.u. (in  $\omega$ B97X-D/def-TZVP// $\omega$ B97X-D/def2-SVP level)

|   |             |             |            |
|---|-------------|-------------|------------|
| C | -4.42841100 | -7.55568700 | 1.34292900 |
| C | -3.09057900 | -7.91143600 | 1.21255300 |



---

|   |              |             |             |
|---|--------------|-------------|-------------|
| C | -7.71549300  | -4.68458100 | 1.45432900  |
| C | -6.68277400  | -5.61285800 | 1.44671800  |
| C | -10.37574500 | -1.37183400 | 1.30865900  |
| C | -9.99793400  | -2.70978500 | 1.35553200  |
| C | -9.14403700  | 2.83324800  | 1.27268100  |
| C | -9.57899900  | 1.51477600  | 1.32290600  |
| C | -7.08963000  | 6.57174000  | 0.98709800  |
| C | -8.15104900  | 5.67267400  | 1.01878400  |
| C | -2.78780400  | 7.53007800  | 1.14160400  |
| C | -4.13633300  | 7.19344800  | 1.12649800  |
| C | 1.47589300   | 8.32048900  | 1.08224000  |
| C | 0.09454700   | 8.48438600  | 1.04874800  |
| C | 5.29342200   | 6.09072000  | 1.33913900  |
| C | 4.06112800   | 6.73329800  | 1.30100400  |
| C | -5.19832200  | -7.20192900 | 0.22541000  |
| C | -4.60942500  | -7.36713700 | -1.03669700 |
| C | -3.27831400  | -7.74463300 | -1.16824200 |
| C | -2.46774900  | -7.95232800 | -0.04328500 |
| C | -8.59598300  | -4.57203100 | 0.37008900  |
| C | -8.48686100  | -5.52135600 | -0.65570000 |
| C | -7.45866100  | -6.46008700 | -0.65609600 |
| C | -6.49066300  | -6.47784900 | 0.36024200  |
| C | -10.16292000 | -0.60107400 | 0.15530800  |
| C | -9.72440500  | -1.26870700 | -0.99660300 |
| C | -9.35460100  | -2.60823200 | -0.95276800 |
| C | -9.40266000  | -3.32974700 | 0.24712500  |
| C | -9.22520200  | 3.57622500  | 0.08746700  |

---

|   |              |             |             |
|---|--------------|-------------|-------------|
| C | -9.90554500  | 2.99826100  | -0.99465400 |
| C | -10.34535300 | 1.67882200  | -0.94244900 |
| C | -10.11672300 | 0.88506700  | 0.19182800  |
| C | -6.22312600  | 6.62866600  | -0.11464400 |
| C | -6.54750800  | 5.85358300  | -1.23606800 |
| C | -7.60807300  | 4.95580000  | -1.20475800 |
| C | -8.38676200  | 4.79599600  | -0.05045500 |
| C | -2.14199600  | 7.97831600  | -0.01805500 |
| C | -2.92592200  | 8.18367100  | -1.16262100 |
| C | -4.27635800  | 7.84915500  | -1.17682500 |
| C | -4.89514300  | 7.29299100  | -0.04787100 |
| C | 2.15840300   | 7.71990400  | 0.01507100  |
| C | 1.41517200   | 7.36900700  | -1.12021000 |
| C | 0.03519900   | 7.53167000  | -1.15316000 |
| C | -0.65848300  | 8.05266400  | -0.05242900 |
| C | 6.10044900   | 5.99690400  | 0.19636200  |
| C | 5.67355900   | 6.67855400  | -0.95310600 |
| C | 4.43784900   | 7.31487800  | -0.99445800 |
| C | 3.58078600   | 7.30529200  | 0.11563500  |
| C | 8.69755100   | 3.48429100  | 1.34043800  |
| C | 7.92830600   | 4.64347400  | 1.31369100  |
| C | 8.87879700   | -0.90657400 | 1.40477000  |
| C | 8.90228700   | 0.48296200  | 1.44149700  |
| C | 7.76860200   | -5.01197100 | 1.07725500  |
| C | 8.59117100   | -3.89230700 | 1.14707800  |
| C | 3.83875500   | -6.97803100 | 1.08182300  |
| C | 5.09436500   | -6.38088600 | 1.11149800  |

---

|   |              |             |             |
|---|--------------|-------------|-------------|
| C | 8.78835200   | 2.64934600  | 0.21652600  |
| C | 8.20174600   | 3.10537300  | -0.97229100 |
| C | 7.43408300   | 4.26266400  | -0.99863800 |
| C | 7.21724600   | 5.01673700  | 0.16278400  |
| C | 9.17597700   | -1.60359600 | 0.22582100  |
| C | 9.67833700   | -0.86057100 | -0.85353600 |
| C | 9.70271700   | 0.52899400  | -0.81597700 |
| C | 9.22431100   | 1.23106300  | 0.30127900  |
| C | 7.00657500   | -5.28235700 | -0.07015600 |
| C | 7.23003000   | -4.47470900 | -1.19373300 |
| C | 8.05501900   | -3.35972000 | -1.12588000 |
| C | 8.68965400   | -2.99903800 | 0.07010900  |
| C | 3.28118700   | -7.42156400 | -0.12358600 |
| C | 4.07937400   | -7.35836100 | -1.27468100 |
| C | 5.34078700   | -6.77624700 | -1.24021200 |
| C | 5.84802000   | -6.21419500 | -0.05890000 |
| C | -0.18757800  | -8.68232300 | 0.79355600  |
| C | 1.19825200   | -8.54866100 | 0.78263900  |
| C | -0.98753500  | -8.03306600 | -0.15889700 |
| C | -0.33424700  | -7.31637900 | -1.17193200 |
| C | 1.04907900   | -7.19715200 | -1.19409500 |
| C | 1.84054700   | -7.77469900 | -0.19314100 |
| H | -4.86262100  | -7.49549200 | 2.34315600  |
| H | -2.50266700  | -8.08655400 | 2.11608900  |
| H | -7.76805500  | -3.95732600 | 2.26746600  |
| H | -5.95151200  | -5.58645200 | 2.25656600  |
| H | -10.78488000 | -0.90172300 | 2.20612900  |

---

|   |              |             |             |
|---|--------------|-------------|-------------|
| H | -10.11111800 | -3.26685200 | 2.28888300  |
| H | -8.62167800  | 3.25023700  | 2.13639800  |
| H | -9.38369000  | 0.93118600  | 2.22483400  |
| H | -6.90307900  | 7.20947600  | 1.85453600  |
| H | -8.77836700  | 5.61663900  | 1.91176400  |
| H | -2.20570400  | 7.35096200  | 2.04834800  |
| H | -4.58241500  | 6.75360300  | 2.02109100  |
| H | 2.03299900   | 8.64726100  | 1.96355100  |
| H | -0.41212500  | 8.93717700  | 1.90438200  |
| H | 5.58150000   | 5.56158000  | 2.24967100  |
| H | 3.41861500   | 6.70136400  | 2.18369900  |
| H | -5.17594400  | -7.11983200 | -1.93677500 |
| H | -2.84915100  | -7.82379100 | -2.16925200 |
| H | -9.19067400  | -5.49664600 | -1.49141400 |
| H | -7.38347000  | -7.16233300 | -1.48952200 |
| H | -9.54930200  | -0.70456400 | -1.91508100 |
| H | -8.90191300  | -3.06320900 | -1.83673400 |
| H | -10.04484700 | 3.57236300  | -1.91400300 |
| H | -10.82380100 | 1.24133200  | -1.82202700 |
| H | -5.89434300  | 5.87021600  | -2.11124600 |
| H | -7.76082100  | 4.28719000  | -2.05475000 |
| H | -2.46379700  | 8.58420500  | -2.06812600 |
| H | -4.85276500  | 7.99094900  | -2.09416800 |
| H | 1.91338000   | 6.88158700  | -1.96114900 |
| H | -0.52267200  | 7.16951500  | -2.01961000 |
| H | 6.30124700   | 6.68033700  | -1.84702400 |
| H | 4.11881900   | 7.80419300  | -1.91771400 |

---

|   |             |             |             |
|---|-------------|-------------|-------------|
| H | 9.19492300  | 3.19784700  | 2.27006300  |
| H | 7.84126100  | 5.24333400  | 2.22256000  |
| H | 8.49044700  | -1.44806200 | 2.26996300  |
| H | 8.53019000  | 0.98953300  | 2.33432300  |
| H | 7.68067200  | -5.65998000 | 1.95221500  |
| H | 9.12461600  | -3.68068100 | 2.07685600  |
| H | 3.24052700  | -7.01085500 | 1.99540800  |
| H | 5.44640000  | -5.94700500 | 2.04952100  |
| H | 8.24091800  | 2.48294000  | -1.86829500 |
| H | 6.89650500  | 4.51191700  | -1.91541100 |
| H | 9.99495900  | -1.37472000 | -1.76409100 |
| H | 10.03934100 | 1.07885900  | -1.69797900 |
| H | 6.65776700  | -4.64436700 | -2.10759900 |
| H | 8.10035500  | -2.68861900 | -1.98583400 |
| H | 3.69226800  | -7.74723900 | -2.21956000 |
| H | 5.92478300  | -6.72292400 | -2.16151600 |
| H | -0.65594500 | -9.28842900 | 1.57241600  |
| H | 1.79242600  | -9.04336000 | 1.55492300  |
| H | -0.91880800 | -6.77338400 | -1.91682200 |
| H | 1.51844300  | -6.57298600 | -1.95798000 |
| C | 0.59178500  | -3.28253400 | -0.74932100 |
| C | -0.44199500 | -2.43010100 | -0.95063700 |
| C | -1.04175500 | -1.35725100 | -1.06048100 |
| C | -1.34054900 | -0.03632700 | -1.10538600 |
| C | -1.17645400 | 1.18569700  | -1.05688400 |
| C | -0.62650600 | 2.41780600  | -0.93082700 |
| C | 0.25668300  | 3.25867000  | -0.74117200 |

|   |            |             |             |
|---|------------|-------------|-------------|
| C | 1.46116300 | 3.82708700  | -0.49211800 |
| C | 2.67099600 | 3.82639500  | -0.24722500 |
| C | 3.92957000 | 3.39581200  | 0.00288400  |
| C | 4.83716900 | 2.58027500  | 0.18493400  |
| C | 5.54341800 | 1.43429200  | 0.32195000  |
| C | 5.77449500 | 0.22324200  | 0.36323800  |
| C | 5.64257000 | -1.12342600 | 0.33126700  |
| C | 5.10008700 | -2.22463700 | 0.20908000  |
| C | 4.16426600 | -3.18012700 | -0.00308800 |
| C | 3.05068900 | -3.65245300 | -0.24640800 |
| C | 1.72554400 | -3.71364400 | -0.52157200 |

[14]CPP : cyclo[18]carbon

HF = -3919.9732402 a.u. (in  $\omega$ B97X-D/def-TZVP// $\omega$ B97X-D/def2-SVP level)

|   |             |             |             |
|---|-------------|-------------|-------------|
| C | 10.36272700 | 0.68897100  | -0.91818500 |
| C | 10.36015900 | -0.70120200 | -0.91763800 |
| C | 8.06436000  | 4.40720800  | -1.09505400 |
| C | 8.83933600  | 3.25446700  | -1.07330500 |
| C | 5.12932600  | 7.53789400  | -1.04205700 |
| C | 6.34647200  | 6.86537600  | -1.02977400 |
| C | 0.74299900  | 8.01737500  | -1.09575500 |
| C | 2.10650100  | 7.74734000  | -1.09126700 |
| C | -3.52002100 | 8.78603900  | -1.05102300 |
| C | -2.14076200 | 8.96729200  | -1.05500100 |
| C | -7.22473100 | 6.39702000  | -1.09150200 |
| C | -6.03514900 | 7.11513900  | -1.11079500 |

---

|   |              |             |             |
|---|--------------|-------------|-------------|
| C | -10.56475100 | 3.71494900  | -0.92935900 |
| C | -9.85064400  | 4.90902300  | -0.93789800 |
| C | -10.61437100 | -0.68630200 | -1.06444200 |
| C | -10.61328200 | 0.70327500  | -1.06397700 |
| C | 9.92454200   | 1.41413200  | 0.20089200  |
| C | 9.66594900   | 0.69117600  | 1.37322700  |
| C | 9.66358100   | -0.69923800 | 1.37378600  |
| C | 9.91946700   | -1.42395300 | 0.20199700  |
| C | 7.88657000   | 5.18290500  | 0.05860100  |
| C | 8.63825600   | 4.83524100  | 1.19140200  |
| C | 9.41573600   | 3.68177400  | 1.21251000  |
| C | 9.47243200   | 2.82639300  | 0.10192700  |
| C | 4.29859200   | 7.55202800  | 0.08772600  |
| C | 4.78231000   | 6.95319900  | 1.25823200  |
| C | 5.99646500   | 6.27663900  | 1.26800800  |
| C | 6.77960800   | 6.17261400  | 0.11000300  |
| C | 0.11540200   | 8.59207300  | 0.01777200  |
| C | 0.92020500   | 8.95591800  | 1.10649700  |
| C | 2.28546000   | 8.68727700  | 1.11042600  |
| C | 2.89845500   | 8.04347200  | 0.02636500  |
| C | -4.18029100  | 8.28319100  | 0.07948800  |
| C | -3.41871600  | 8.07149900  | 1.23702400  |
| C | -2.04085000  | 8.25670000  | 1.23461500  |
| C | -1.36779900  | 8.65775600  | 0.07318300  |
| C | -8.01356600  | 6.33320000  | 0.06523200  |
| C | -7.62590400  | 7.11872100  | 1.16042100  |
| C | -6.43517500  | 7.83857700  | 1.14057700  |

---

|   |              |             |             |
|---|--------------|-------------|-------------|
| C | -5.58497600  | 7.80049000  | 0.02553400  |
| C | -10.52344000 | 2.85636800  | 0.17926200  |
| C | -9.86144700  | 3.31179600  | 1.32760500  |
| C | -9.14936800  | 4.50539400  | 1.31972400  |
| C | -9.06939400  | 5.29155700  | 0.16256100  |
| C | -10.92459700 | -1.40997000 | 0.09489600  |
| C | -11.38023100 | -0.68745200 | 1.20773500  |
| C | -11.37913400 | 0.70412100  | 1.20820300  |
| C | -10.92236900 | 1.42666000  | 0.09584300  |
| C | -9.85829400  | -4.89337500 | -0.94104000 |
| C | -10.57047400 | -3.69815200 | -0.93180200 |
| C | -6.04647000  | -7.10597000 | -1.11470700 |
| C | -7.23488700  | -6.38591200 | -1.09522900 |
| C | -2.15500000  | -8.96496400 | -1.05860700 |
| C | -3.53396200  | -8.78137900 | -1.05490100 |
| C | 2.09464700   | -7.75275400 | -1.09396800 |
| C | 0.73074800   | -8.02083600 | -1.09902900 |
| C | -9.07779600  | -5.27789500 | 0.15926000  |
| C | -9.15660500  | -4.49232500 | 1.31690700  |
| C | -9.86675400  | -3.29758700 | 1.32548700  |
| C | -10.52791600 | -2.84035800 | 0.17738300  |
| C | -5.59751200  | -7.79246000 | 0.02141200  |
| C | -6.44789000  | -7.82965300 | 1.13634700  |
| C | -7.63745800  | -7.10789900 | 1.15636000  |
| C | -8.02371000  | -6.32126100 | 0.06147300  |
| C | -1.38170900  | -8.65659100 | 0.06967500  |
| C | -2.05430400  | -8.25418400 | 1.23090800  |



---

|   |             |             |             |
|---|-------------|-------------|-------------|
| C | -3.43185300 | -8.06670800 | 1.23307000  |
| C | -4.19359300 | -8.27734900 | 0.07545700  |
| C | 2.88545300  | -8.04879600 | 0.02450200  |
| C | 2.27091700  | -8.69089300 | 1.10869100  |
| C | 0.90530100  | -8.95763400 | 1.10416600  |
| C | 0.10162600  | -8.59347500 | 0.01471700  |
| C | 6.33506000  | -6.87297700 | -1.02916900 |
| C | 5.11785900  | -7.54549200 | -1.04212600 |
| C | 8.82670400  | -3.26048000 | -1.07102100 |
| C | 8.05082700  | -4.41257600 | -1.09315100 |
| C | 9.46230100  | -2.83461000 | 0.10370800  |
| C | 9.40513800  | -3.69056500 | 1.21382200  |
| C | 8.62665500  | -4.84345200 | 1.19231000  |
| C | 7.87428100  | -5.18983200 | 0.05964300  |
| C | 6.76713500  | -6.17933400 | 0.11048500  |
| C | 5.98278000  | -6.28231300 | 1.26778700  |
| C | 4.76845800  | -6.95857300 | 1.25724600  |
| C | 4.28590700  | -7.55842700 | 0.08674600  |
| H | 10.65239700 | 1.21924700  | -1.82831500 |
| H | 10.64775200 | -1.23327100 | -1.82738800 |
| H | 7.49391100  | 4.63855500  | -1.99672200 |
| H | 8.84982600  | 2.61443200  | -1.95760200 |
| H | 4.80608100  | 8.04343300  | -1.95506100 |
| H | 6.95648300  | 6.85335800  | -1.93586100 |
| H | 0.14044100  | 7.70439000  | -1.95138800 |
| H | 2.54926400  | 7.22605100  | -1.94297800 |
| H | -4.09150600 | 9.01228000  | -1.95433200 |

---

|   |              |             |             |
|---|--------------|-------------|-------------|
| H | -1.65055600  | 9.33289200  | -1.96052600 |
| H | -7.49146700  | 5.79105000  | -1.96008600 |
| H | -5.39693900  | 7.05749600  | -1.99514600 |
| H | -11.12419900 | 3.42033100  | -1.82055500 |
| H | -9.86165500  | 5.53255300  | -1.83518600 |
| H | -10.25407600 | -1.21405900 | -1.95006700 |
| H | -10.25216000 | 1.23105900  | -1.94925000 |
| H | 9.32844900   | 1.21531300  | 2.26966600  |
| H | 9.32438700   | -1.22156700 | 2.27063100  |
| H | 8.57964900   | 5.45348700  | 2.09020000  |
| H | 9.94856400   | 3.41688100  | 2.12873100  |
| H | 4.15742000   | 6.93719500  | 2.15396100  |
| H | 6.29030100   | 5.73505100  | 2.16949200  |
| H | 0.46693400   | 9.44403600  | 1.97262300  |
| H | 2.88498700   | 8.96985700  | 1.97908600  |
| H | -3.89781400  | 7.66780700  | 2.13164600  |
| H | -1.46739200  | 7.99886200  | 2.12788400  |
| H | -8.24685500  | 7.13619600  | 2.05938900  |
| H | -6.14256900  | 8.41206500  | 2.02341600  |
| H | -9.80530600  | 2.66921200  | 2.20888000  |
| H | -8.55333300  | 4.77162500  | 2.19537600  |
| H | -11.69192000 | -1.22184000 | 2.10847300  |
| H | -11.68997600 | 1.23839900  | 2.10929700  |
| H | -9.87022800  | -5.51631100 | -1.83872800 |
| H | -11.12936200 | -3.40206500 | -1.82286400 |
| H | -5.40805400  | -7.04902500 | -1.99895800 |
| H | -7.50056400  | -5.77916100 | -1.96359300 |

---

|   |             |             |             |
|---|-------------|-------------|-------------|
| H | -1.66527500 | -9.33155000 | -1.96399300 |
| H | -4.10568000 | -9.00676800 | -1.95827700 |
| H | 2.53879700  | -7.23307400 | -1.94592800 |
| H | 0.12915400  | -7.70796400 | -1.95538700 |
| H | -8.56110000 | -4.76006500 | 2.19245800  |
| H | -9.80966600 | -2.65567100 | 2.20718800  |
| H | -6.15627600 | -8.40396600 | 2.01897900  |
| H | -8.25853500 | -7.12475900 | 2.05525100  |
| H | -1.48059900 | -7.99713400 | 2.12424000  |
| H | -3.91042400 | -7.66206600 | 2.12754400  |
| H | 2.86949800  | -8.97348400 | 1.97800000  |
| H | 0.45084200  | -9.44435800 | 1.97045200  |
| H | 6.94600500  | -6.86158800 | -1.93464900 |
| H | 4.79546100  | -8.05166700 | -1.95507600 |
| H | 8.83688800  | -2.61948900 | -1.95462700 |
| H | 7.47901300  | -4.64251100 | -1.99432000 |
| H | 9.93908100  | -3.42695200 | 2.12977300  |
| H | 8.56812800  | -5.46238200 | 2.09065100  |
| H | 6.27583800  | -5.74000900 | 2.16908400  |
| H | 4.14254800  | -6.94155000 | 2.15224300  |
| C | 1.89667300  | -3.60289100 | -0.79169400 |
| C | 0.78456500  | -2.89521500 | -1.10642600 |
| C | 0.08007400  | -1.90249000 | -1.30903100 |
| C | -0.35118800 | -0.62418100 | -1.43670100 |
| C | -0.32513400 | 0.60940000  | -1.43626100 |
| C | 0.06773800  | 1.90233900  | -1.33379600 |
| C | 0.81469100  | 2.86316900  | -1.13005600 |

---

|   |            |             |             |
|---|------------|-------------|-------------|
| C | 1.90151300 | 3.61559600  | -0.83114600 |
| C | 3.07440600 | 3.81599200  | -0.50245600 |
| C | 4.35974500 | 3.59019500  | -0.14088300 |
| C | 5.34221600 | 2.90099000  | 0.14616000  |
| C | 6.15810800 | 1.84881000  | 0.38777300  |
| C | 6.50657400 | 0.67027900  | 0.49311600  |
| C | 6.52388800 | -0.68264000 | 0.50538300  |
| C | 6.12863000 | -1.84590000 | 0.39871700  |
| C | 5.34474400 | -2.92740700 | 0.17939700  |
| C | 4.33521900 | -3.57546300 | -0.10695600 |
| C | 3.05888300 | -3.85746700 | -0.46349200 |
